# Supplementary material for: Sepsis Outcomes Worsened by Frailty: Findings from a National Inpatient Sample
Source: Research Square preprint supplement (doi:10.21203/rs.3.rs-6677280/v1), 2025-06-17
Supplement: Supplementary file 1 [file 9b9438186d9d678de6099220.docx]

**Supplementary Table S2: Showing the variables used for extraction of the hospital frailty risk score (HFRS)**

| **ICD_Code** | **ICD_Description** | **Deficit_Category** | **Points** |
| --- | --- | --- | --- |
| **F00** | Dementia in Alzheimer's disease | Memory & cognitive problems | 7.1 |
| **G81** | Hemiplegia | Cerebrovascular disease | 4.4 |
| **G30** | Alzheimer's disease | Memory & cognitive problems | 4 |
| **I69** | Sequelae of cerebrovascular disease (secondary codes) | Cerebrovascular disease | 3.7 |
| **R29** | Other symptoms and signs involving the nervous and musculoskeletal systems (R29.6 Tendency to fall) | Falls | 3.6 |
| **N39** | Other disorders of urinary system (includes urinary tract infection and urinary incontinence) | Urinary system | 3.2 |
| **W19** | Unspecified fall | Falls | 3.2 |
| **S00** | Superficial injury of head | Falls | 3.2 |
| **F05** | Delirium, not induced by alcohol and other psychoactive substances | Memory & cognitive problems | 3.2 |
| **R31** | Unspecified haematuria | Urinary system | 3 |
| **B96** | Other bacterial agents as the cause of diseases classified to other chapters (secondary code) | Acute Infection | 2.9 |
| **R41** | Other symptoms and signs involving cognitive functions and awareness | Memory & cognitive problems | 2.7 |
| **R26** | Abnormalities of gait and mobility | Mobility and transfer problems | 2.6 |
| **R56** | Convulsions, not elsewhere classified | Acute neurological | 2.6 |
| **I67** | Other cerebrovascular diseases | Cerebrovascular disease | 2.6 |
| **R40** | Somnolence, stupor and coma | Acute neurological | 2.5 |
| **T83** | Complications of genitourinary prosthetic devices, implants and grafts | Urinary system | 2.4 |
| **S06** | Intracranial injury | Cerebrovascular disease | 2.4 |
| **E86** | Volume depletion | Acute kidney injury/Dehydration | 2.3 |
| **E87** | Other disorders of fluid, electrolyte and acid-base balance | Electrolytes and Metabolic disorders | 2.3 |
| **S42** | Fracture of shoulder and upper arm | Fragility Fractures | 2.3 |
| **M25** | Other joint disorders, not elsewhere classified | Arthritis | 2.3 |
| **R54** | Senility | Memory & cognitive problems | 2.2 |
| **F03** | Unspecified dementia | Memory & cognitive problems | 2.1 |
| **Z50** | Care involving use of rehabilitation procedures | Mobility and transfer problems | 2.1 |
| **W18** | Other fall on same level | Falls | 2.1 |
| **S80** | Superficial injury of lower leg | Falls | 2 |
| **L03** | Cellulitis | Acute Infection | 2 |
| **Z75** | Problems related to medical facilities and other health care | Social vulnerability | 2 |
| **F01** | Vascular dementia | Memory & cognitive problems | 2 |
| **H54** | Blindness and low vision | Sensory loss | 1.9 |
| **E53** | Deficiency of other B group vitamins | Anaemia & haematinic deficiency | 1.9 |
| **R55** | Syncope and collapse | Hypotension / syncope | 1.8 |
| **K59** | Other functional intestinal disorders | Digestive tract functional disorders | 1.8 |
| **S22** | Fracture of rib(s), sternum and thoracic spine | Fragility Fractures | 1.8 |
| **N17** | Acute renal failure | Acute kidney injury/Dehydration | 1.8 |
| **Z60** | Problems related to social environment | Social vulnerability | 1.8 |
| **G20** | Parkinson's disease | Parkinsonism & tremor | 1.8 |
| **B95** | Streptococcus and staphylococcus as the cause of diseases classified to other chapters | Acute Infection | 1.7 |
| **L89** | Decubitus ulcer | Skin ulcer/pressure sore | 1.7 |
| **Z22** | Carrier of infectious disease | Hospital acquired complications or infections | 1.7 |
| **R44** | Other symptoms and signs involving general sensations and perceptions | Sensory loss | 1.6 |
| **K26** | Duodenal ulcer | Peptic ulcer | 1.6 |
| **I95** | Hypotension | Hypotension / syncope | 1.6 |
| **N19** | Unspecified renal failure | Chronic kidney disease | 1.6 |
| **L97** | Ulcer of lower limb, not elsewhere classified | Skin ulcer/pressure sore | 1.6 |
| **A41** | Other septicaemia | Acute Infection | 1.6 |
| **X59** | Exposure to unspecified factor | Other trauma (excl. fragility fractures) | 1.5 |
| **J96** | Respiratory failure, not elsewhere classified | Respiratory disease | 1.5 |
| **G40** | Epilepsy | Acute neurological | 1.5 |
| **Z87** | Personal history of other diseases and conditions | Social vulnerability | 1.5 |
| **M19** | Other arthrosis | Arthritis | 1.5 |
| **S72** | Fracture of femur | Fragility Fractures | 1.4 |
| **E16** | Other disorders of pancreatic internal secretion | Electrolytes and Metabolic disorders | 1.4 |
| **R94** | Abnormal results of function studies | Electrolytes and Metabolic disorders | 1.4 |
| **M81** | Osteoporosis without pathological fracture | Osteoporosis | 1.4 |
| **S32** | Fracture of lumbar spine and pelvis | Fragility Fractures | 1.4 |
| **N18** | Chronic renal failure | Chronic kidney disease | 1.4 |
| **R33** | Retention of urine | Urinary system | 1.3 |
| **R69** | Unknown and unspecified causes of morbidity | Uncertain diagnosis/Generally unwell | 1.3 |
| **N28** | Other disorders of kidney and ureter, not elsewhere classified | Chronic kidney disease | 1.3 |
| **G45** | Transient cerebral ischaemic attacks and related syndromes | Cerebrovascular disease | 1.2 |
| **R45** | Symptoms and signs involving emotional state | Depression and mood disorders | 1.2 |
| **R32** | Unspecified urinary incontinence | Urinary system | 1.2 |
| **Y95** | Nosocomial condition | Hospital acquired complications or infections | 1.2 |
| **S09** | Other and unspecified injuries of head | Falls | 1.2 |
| **G31** | Other degenerative diseases of nervous system, not elsewhere classified | Memory & cognitive problems | 1.2 |
| **M79** | Other soft tissue disorders, not elsewhere classified | Skin ulcer/pressure sore | 1.1 |
| **A04** | Other bacterial intestinal infections | Acute Infection | 1.1 |
| **A09** | Diarrhoea and gastroenteritis of presumed infectious origin | Acute Infection | 1.1 |
| **J18** | Pneumonia, organism unspecified | Acute Infection | 1.1 |
| **W06** | Fall involving bed | Falls | 1.1 |
| **S01** | Open wound of head | Falls | 1.1 |
| **Z74** | Problems related to care-provider dependency | Social vulnerability | 1.1 |
| **R02** | Gangrene, not elsewhere classified | Acute Infection | 1 |
| **E55** | Vitamin D deficiency | Osteoporosis | 1 |
| **J69** | Pneumonitis due to solids and liquids | Swallowing problems | 1 |
| **Z93** | Artificial opening status | Digestive tract functional disorders | 1 |
| **R47** | Speech disturbances, not elsewhere classified | Sensory loss | 1 |
| **H91** | Other hearing loss | Sensory loss | 0.9 |
| **M41** | Scoliosis | Arthritis | 0.9 |
| **R63** | Symptoms and signs concerning food and fluid intake | Uncertain diagnosis/Generally unwell | 0.9 |
| **W10** | Fall on and from stairs and steps | Falls | 0.9 |
| **W01** | Fall on same level from slipping, tripping and stumbling | Falls | 0.9 |
| **E05** | Thyrotoxicosis [hyperthyroidism] | Electrolytes and Metabolic disorders | 0.9 |
| **U80** | Agent resistant to penicillin and related antibiotics (secondary code only) | Hospital acquired complications or infections | 0.8 |
| **M80** | Osteoporosis with pathological fracture | Fragility Fractures | 0.8 |
| **Z99** | Dependence on enabling machines and devices, not elsewhere classified | Social vulnerability | 0.8 |
| **I63** | Cerebral Infarction | Cerebrovascular disease | 0.8 |
| **R13** | Dysphagia | Swallowing problems | 0.8 |
| **K92** | Other diseases of digestive system | Digestive tract functional disorders | 0.8 |
| **R00** | Abnormalities of heart beat | Atrial fibrillation | 0.7 |
| **F10** | Mental and behavioural disorders due to use of alcohol | Mental health/Mood | 0.7 |
| **Y84** | Other medical procedures as the cause of abnormal reaction of the patient, or of later complication, without mention of misadventure at the time of the procedure | Hospital acquired complications or infections | 0.7 |
| **J22** | Unspecified acute lower respiratory infection | Acute Infection | 0.7 |
| **N20** | Calculus of kidney and ureter | Urinary system | 0.7 |
| **R79** | Other abnormal findings of blood chemistry | Electrolytes and Metabolic disorders | 0.6 |
| **Z73** | Problems related to life-management difficulty | Social vulnerability | 0.6 |
| **F32** | Depressive episode | Depression and mood disorders | 0.5 |
| **Z91** | Personal history of risk-factors, not elsewhere classified | Social vulnerability | 0.5 |
| **M48** | Spinal stenosis (secondary code only) | Arthritis | 0.5 |
| **S51** | Open wound of forearm | Other trauma (excl. fragility fractures) | 0.5 |
| **E83** | Disorders of mineral metabolism | Electrolytes and Metabolic disorders | 0.4 |
| **M15** | Polyarthrosis | Arthritis | 0.4 |
| **D64** | Other anaemias | Anaemia & haematinic deficiency | 0.4 |
| **L08** | Other local infections of skin and subcutaneous tissue | Acute Infection | 0.4 |
| **R11** | Nausea and vomiting | Digestive tract functional disorders | 0.3 |
| **K52** | Other noninfective gastroenteritis and colitis | Digestive tract functional disorders | 0.3 |
| **R50** | 3.6 | Uncertain diagnosis/Generally unwell | 0.1 |
