# Supplementary material for: Sepsis Outcomes Worsened by Frailty: Findings from a National Inpatient Sample
Source: Research Square preprint supplement (doi:10.21203/rs.3.rs-6677280/v1), 2025-06-17
Supplement: Supplementary file 2 [file bfa9cd0d9ca311c3544608d4.docx]

**Supplementary table S1: Details of ICD-10 diagnostic codes**

| **Diagnosis** | | **ICD-10-codes (diagnostic and procedural)** |
| --- | --- | --- |
|  | **Sepsis** | A40.0, A40.1, A40.3, A40.8, A40.9, A41.0, A41.1, A41.2, A41.3, A41.4, A41.5, A41.8, A41.9 |
|  | **Acute cerebrovascular disease** | 30230H1, 30230J1, 30230K1, 30230L1, 30230M1, 30230N1, 30230P1, 30230Q1, 30230R1, 30230S1, 30233H1, 30233J1, 30233K1, 30233L1, 30233M1, 30233N1, 30233P1, 30233Q1, 30233R1, 30233S1, 30240H1, 30240J1, 30240K1, 30240L1, 30240M1, 30240N1, 30240P1, 30240Q1, 30240R1, 30240S1, 30243H1, 30243J1, 30243K1, 30243L1, 30243M1, 30243N1, 30243P1, 30243Q1, 30243R1, 30243S1, 30250H1, 30250J1, 30250K1, 30250L1, 30250M1, 30250N1, 30250P1, 30250Q1, 30250R1, 30250S1, 30253H1, 30253J1, 30253K1, 30253L1, 30253M1, 30253N1, 30253P1, 30253Q1, 30253R1, 30253S1, 30260H1, 30260J1, 30260K1, 30260L1, 30260M1, 30260N1, 30260P1, 30260Q1, 30260R1, 30260S1, 30263H1, 30263J1, 30263K1, 30263L1, 30263M1, 30263N1, 30263P1, 30263Q1, 30263R1, 30263S1, 30230H0, 30230J0, 30230K0, 30230L0, 30230M0, 30230N0, 30230P0, 30230Q0, 30230R0, 30230S0, 30233H0, 30233J0, 30233K0, 30233L0, 30233M0, 30233N0, 30233P0, 30233Q0, 30233R0, 30233S0, 30240H0, 30240J0, 30240K0, 30240L0, 30240M0, 30240N0, 30240P0, 30240Q0, 30240R0, 30240S0, 30243H0, 30243J0, 30243K0, 30243L0, 30243M0, 30243N0, 30243P0, 30243Q0, 30243R0, 30243S0, 30250H0, 30250J0, 30250K0, 30250L0, 30250M0, 30250N0, 30250P0, 30250Q0, 30250R0, 30250S0, 30253H0, 30253J0, 30253K0, 30253L0, 30253M0, 30253N0, 30253P0, 30253Q0, 30253R0, 30253S0, 30260H0, 30260J0, 30260K0, 30260L0, 30260M0, 30260N0, 30260P0, 30260Q0, 30260R0, 30260S0, 30263H0, 30263J0, 30263K0, 30263L0, 30263M0, 30263N0, 30263P0, 30263Q0, 30263R0, 30263S0 |
|  | **Intracranial Hemorrhage** | I60, I60.0, I60.1, I60.2, I60.3, I60.4, I60.5, I60.9, I61, I61.0, I61.1, I61.2, I61.3, I61.4, I61.5, I61.9, I62, I62.0, I62.9 |
|  | **Delirium** | F0151, F0390, F05, F060, F061, F062, F0630, F064, F068, F10231, F15920, F19921, F19939, F19950, F19951, F1997, G92, G9340, G9341, G9349, R400, R404, R4182 |
|  | **Respiratory Failure** | N390, N3000, N3001, N3030, N3031, N3080, N3081, N3090, N3091, N340, N341, N342, N343, T83021 |
|  | **pneumonia** | A021, A207, A227, A400, A401, A403, A408, A409, A4101, A4102, A411, A412, A413, A414, A4150, A4151, A4152, A4153, A4159, A4181, A4189, A419, A5486, A267, A327, A427, B377, R6520, R6521 |
|  | **Heart Failure** | I2601, I2602, I2609, I2690, I2692, I2693, I2694, I2699 |
|  | **Cardiac Arrest** | D6951, D6959, D696 |
|  | **Acute Renal Failure** | N170, N171, N172, N178, N179 |
|  | **Thrombocytopenia** | J95821, J95822, J9610, J9611, J9612, J9620, J9621, J9622, J9690, J9691, J9692 |
|  | **DVT** | K910, K911, K912, K9130, K9131, K9132, K9172, K91841, K91850, K91858, K91871, K91873, K9189 |
|  | **Neurological disorders** | G40(x), I63 |
|  | **Paralysis** | G83.9 |
|  | **Congestive heart failure** | I50.0, I50.1, I50.2, I50.20, I50.21, I50.22, I50.23, I50.3, I50.30, I50.31, I50.32, I50.33, I50.4, I50.40, I50.41, I50.42, I50.43, I50.8, I50.81, I50.82, I50.83, I50.84, I50.89, I50.9 |
|  | **Hypertension** | I10, I11, I11.0, I11.9, I12, I12.0, I12.9, I13, I13.0, I13.1, I13.2, I13.9, I15, I15.0, I15.1, I15.8, I15.9 |
|  | **Acquired immune deficiency syndrome** | B20 |
|  | **Chronic pulmonary disease** | J40, J41.0, J41.1, J41.8, J42, J43.0, J43.1 J43.2,J43.8, J43.9, J44.0, J44.1, J44.8, J44.9, J45.0, J45.1, J45.8, J45.9, J46, J47 |
|  | **Liver disease** | K70, K71, K72, K73, K74, K75, K76, K77 |
|  | **Renal failure** | N17, N17.0, N17.1, N17.2, N17.8, N17.9, N18, N18.1, N18.2, N18.3, N18.30, N18.31, N18.32, N18.4, N18.5, N18.6, N18.9, N19 |
|  | **Diabetes, uncomplicated** | E13.9 |
|  | **Diabetes with chronc complications** | E10.1, E10.2, E10.3, E10.4, E10.5, E10.6, E10.7, E10.9, E11.1, E11.2, E11.3, E11.4, E11.5, E11.6, E11.7, E11.8, E11.9 |
|  | **Hypothyroidism** | E03.0, E03.1, E03.2, E03.3, E03.4, E03.9 |
|  | **Fluid and electrolyte disorders** | E87.0, E87.1, E87.2, E87.3, E87.4, E87.5, E87.6, E87.7, E87.8, E87.9 |
|  | **Weight loss** | R63.4 |
|  | **Malnutrition** | E43, E440, E441，E40, E41, E42, E43, E44, E45, E46, R64, R63.6，E40.x-E46.x, R63.4, E44.x, E46.x, E40.x, E41.x, E42.x, E43.x, R64 |
|  | **Continuous mechanical ventilation** | F028GCZ, F028GGZ, F028GYZ, F028GZZ, 5A09357, 5A0935B, 5A09359, 5A0935Z, 5A09457, 5A09458, 5A09459, 5A0945B, 5A0945Z, 5A09557, 5A09558, 5A09559, 5A0955B, 5A0955Z, 5A09358 |
